# Supplementary material for: Identification and elimination of false positives in electrochemical nitrogen reduction studies
Source: PubMed Central journal article supplement (PMC7641139; doi:10.1038/s41467-020-19130-z), 2020-11-03
Supplement: 41467_2020_19130_MOESM1_ESM.pdf [file 41467_2020_19130_MOESM1_ESM.pdf]

## SUPPLEMENTARY INFORMATION FOR:

# Identification and elimination of false positives in electrochemical nitrogen reduction studies

Jaechol Choi<sup>1,2</sup>, Bryan H. R. Suryanto<sup>1</sup>, Dabin Wang<sup>1</sup>, Hoang-Long Du<sup>1,2</sup>, Rebecca Y. Hodgetts<sup>1,2</sup>, Federico M. Ferrero Vallana<sup>1</sup>, Douglas. R. MacFarlane<sup>1,2</sup> and Alexandr N. Simonov<sup>1,2</sup>

<sup>1</sup>School of Chemistry and the <sup>2</sup>ARC Centre of Excellence for Electromaterials Science, Monash University, Victoria, Australia

Correspondence and requests for materials should be addressed to:

D.R.M. (email: [douglas.macfarlane@monash.edu](mailto:douglas.macfarlane@monash.edu)), A.N.S. (email: [alexandr.simonov@monash.edu](mailto:alexandr.simonov@monash.edu))

## TABLE OF CONTENTS

|                                                                                                                                                                                 | <b>Page</b> |
|---------------------------------------------------------------------------------------------------------------------------------------------------------------------------------|-------------|
| <b>Supplementary Table 1.</b> Summary of aqueous NRR results reported between 2010 and 2020.                                                                                    | 3           |
| <b>Supplementary Table 2.</b> Summary of non-aqueous NRR results reported between 1993 and 2020.                                                                                | 10          |
| <b>Supplementary Figure 1.</b> Synthesis, characterisation and testing of CN <sub>x</sub> materials.                                                                            | 11          |
| <b>Supplementary Figure 2.</b> Ammonia generation by a vanadium nitride electrode.                                                                                              | 12          |
| <b>Supplementary Figure 3.</b> Gas chromatographic analysis of the N <sub>2</sub> O content in <sup>14</sup> N <sub>2</sub> , <sup>15</sup> N <sub>2</sub> and Ar gas supplies. | 13          |
| <b>Supplementary Table 3.</b> Potential NH <sub>3</sub> formation rates from N <sub>2</sub> O in flowing-gas and static NRR experiments.                                        | 14          |
| <b>Supplementary Figure 4.</b> Experimental setup for NO <sub>x</sub> scrubbing.                                                                                                | 15          |
| <b>Supplementary Figure 5.</b> Experimental demonstration of NO <sub>x</sub> scrubbing.                                                                                         | 16          |
| <b>Supplementary References</b>                                                                                                                                                 | 17          |

**Supplementary Table 1.** Summary of aqueous NRR results reported between 2010 and 2020.

| No. | Year | Material                                 | N-based material | Electrolyte                           | <i>E</i> (V vs. RHE) | FE (%) | Yield rate (nmol s <sup>-1</sup> cm <sup>-2</sup> ) | Quantitative <sup>15</sup> N <sub>2</sub> test | NO <sub>x</sub> control | Ref. |
|-----|------|------------------------------------------|------------------|---------------------------------------|----------------------|--------|-----------------------------------------------------|------------------------------------------------|-------------------------|------|
| 1   | 2010 | polypyrrole film                         | Y                | 0.1 M Li <sub>2</sub> SO <sub>4</sub> | -0.165               | --     | 0.018                                               | N                                              | N                       | 1    |
| 2   | 2016 | Au/TiO <sub>2</sub>                      | N                | 0.1 M HCl                             | -0.2                 | 8.1    | 0.35                                                | N                                              | N                       | 2    |
| 3   | 2016 | Au                                       | Y                | 0.1 M KOH                             | -0.2                 | 4.0    | 0.027                                               | N                                              | N                       | 3    |
| 4   | 2016 | Au-CeO <sub>x</sub> /RGO                 | Y                | 0.1 M HCl                             | -0.2                 | 10     | 0.14                                                | N                                              | N                       | 4    |
| 5   | 2017 | γ-Fe <sub>2</sub> O <sub>3</sub>         | N                | 0.1 M KOH                             | -0.4                 | 2.0    | 0.016                                               | N                                              | N                       | 5    |
| 6   | 2017 | Fe <sub>2</sub> O <sub>3</sub> -CNT      | Y                | 0.5 M KOH                             | -2 vs AgCl           | 0.30   | 0.019                                               | N                                              | N                       | 6    |
| 7   | 2017 | Fe <sub>2</sub> O <sub>3</sub> -CNT      | Y                | KHCO <sub>3</sub>                     | -2 vs AgCl           | 0.20   | 0.004                                               | N                                              | N                       | 7    |
| 8   | 2017 | polyimide/C                              | Y                | 0.5 M Li <sub>2</sub> SO <sub>4</sub> | -0.4                 | 2.9    | 0.008                                               | N                                              | N                       | 8    |
| 9   | 2017 | Mo                                       | Y                | 0.01 M H <sub>2</sub> SO <sub>4</sub> | -0.4                 | 0.70   | 0.031                                               | N                                              | N                       | 9    |
| 10  | 2017 | FeMOF                                    | Y                | 2 M KOH                               | 1.2                  | 1.4    | 2.1                                                 | N                                              | N                       | 10   |
| 11  | 2018 | Ru                                       | N                | 0.01 M HCl                            | -0.1                 | 1.0    | 0.010                                               | N                                              | N                       | 11   |
| 12  | 2018 | Fe <sub>3</sub> O <sub>4</sub>           | N                | 0.1 M Na <sub>2</sub> SO <sub>4</sub> | -0.4                 | 2.6    | 0.056                                               | N                                              | N                       | 12   |
| 13  | 2018 | RuPt                                     | N                | 1 M KOH                               | 0.123                | 13     | 0.30                                                | N                                              | N                       | 13   |
| 14  | 2018 | Pd <sub>0.2</sub> Cu <sub>0.8</sub> /rGO | N                | 0.1 M KOH                             | -0.2                 | 0.70   | 0.046                                               | N                                              | N                       | 14   |
| 15  | 2018 | Pd                                       | N                | 0.1M PBS                              | 0.1                  | 8.2    | 0.022                                               | N                                              | N                       | 15   |
| 16  | 2018 | Cr <sub>2</sub> O <sub>3</sub>           | Y                | 0.1 M HCl                             | -0.7                 | 8.6    | 0.092                                               | N                                              | N                       | 16   |
| 17  | 2018 | Ru/CN <sub>x</sub>                       | Y                | 0.05 M H <sub>2</sub> SO <sub>4</sub> | -0.2                 | 30     | 0.50                                                | N                                              | N                       | 17   |
| 18  | 2018 | Nb <sub>2</sub> O <sub>5</sub>           | Y                | 0.1 M HCl                             | -0.55                | 9.3    | 0.071                                               | N                                              | N                       | 18   |

| No. | Year | Material                          | N-based material | Electrolyte                            | <i>E</i> (V vs. RHE) | FE (%) | Yield rate (nmol s <sup>-1</sup> cm <sup>-2</sup> ) | Quantitative <sup>15</sup> N <sub>2</sub> test | NO <sub>x</sub> control | Ref. |
|-----|------|-----------------------------------|------------------|----------------------------------------|----------------------|--------|-----------------------------------------------------|------------------------------------------------|-------------------------|------|
| 19  | 2018 | Fe/Fe <sub>3</sub> O <sub>4</sub> | N                | 0.1 M PBS                              | -0.3                 | 8.3    | 0.003                                               | N                                              | N                       | 19   |
| 20  | 2018 | Ag                                | N                | 0.1 M HCl                              | -0.6                 | 4.8    | 0.046                                               | N                                              | N                       | 20   |
| 21  | 2018 | C                                 | N                | 0.1 M Na <sub>2</sub> SO <sub>4</sub>  | -0.3                 | 6.9    | 0.26                                                | N                                              | N                       | 21   |
| 22  | 2018 | NbO <sub>2</sub>                  | N                | 0.05 M H <sub>2</sub> SO <sub>4</sub>  | -0.65                | 20     | 0.19                                                | N                                              | N                       | 22   |
| 23  | 2018 | Y <sub>2</sub> O <sub>3</sub>     | N                | 0.1 M Na <sub>2</sub> SO <sub>4</sub>  | -0.9                 | 2.5    | 0.11                                                | N                                              | N                       | 23   |
| 24  | 2018 | d-MoS <sub>2</sub>                | Y                | 0.1 M Na <sub>2</sub> SO <sub>4</sub>  | -0.4                 | 8.3    | 0.19                                                | N                                              | N                       | 24   |
| 25  | 2018 | Au/CN <sub>x</sub>                | Y                | 0.1 M HCl                              | -0.2                 | 12     | 0.038                                               | N                                              | N                       | 25   |
| 26  | 2018 | Au/C <sub>3</sub> N <sub>4</sub>  | Y                | 0.005 M H <sub>2</sub> SO <sub>4</sub> | -0.1                 | 11     | 0.031                                               | N                                              | N                       | 26   |
| 27  | 2018 | Fe/N-CNT                          | Y                | 0.1 M KOH                              | -0.2                 | 9.3    | 0.29                                                | N                                              | N                       | 27   |
| 28  | 2018 | B-TiO <sub>2</sub>                | N                | 0.1 M Na <sub>2</sub> SO <sub>4</sub>  | -0.8                 | 3.4    | 0.024                                               | N                                              | N                       | 28   |
| 29  | 2018 | B <sub>4</sub> C                  | N                | 0.1 M HCl                              | -0.75                | 16     | 0.043                                               | N                                              | N                       | 29   |
| 30  | 2018 | Au                                | N                | 0.1 M HCl                              | -0.2                 | 6.1    | 0.25                                                | N                                              | N                       | 30   |
| 31  | 2018 | Mn <sub>3</sub> O <sub>4</sub>    | N                | 0.1 M Na <sub>2</sub> SO <sub>4</sub>  | -0.8                 | 3.0    | 0.038                                               | N                                              | N                       | 31   |
| 32  | 2018 | CN <sub>x</sub>                   | N                | 0.1 M HCl                              | -0.2                 | 1.5    | 1.0                                                 | N                                              | N                       | 32   |
| 33  | 2018 | SnO <sub>2</sub>                  | N                | 0.1 M Na <sub>2</sub> SO <sub>4</sub>  | -0.8                 | 1.2    | 0.15                                                | N                                              | N                       | 33   |
| 34  | 2018 | TiO <sub>2</sub>                  | N                | 0.1 M Na <sub>2</sub> SO <sub>4</sub>  | -0.7                 | 2.5    | 0.092                                               | N                                              | N                       | 34   |
| 35  | 2018 | VN                                | N                | 0.05 M H <sub>2</sub> SO <sub>4</sub>  | -0.2                 | 6.5    | 0.50                                                | N                                              | N                       | 35   |
| 36  | 2018 | TiO <sub>2</sub> -rGO             | N                | 0.1 M Na <sub>2</sub> SO <sub>4</sub>  | -0.9                 | 3.3    | 0.099                                               | N                                              | N                       | 36   |
| 37  | 2018 | Cr <sub>2</sub> O <sub>3</sub>    | N                | 0.1 M Na <sub>2</sub> SO <sub>4</sub>  | -0.9                 | 6.8    | 0.050                                               | N                                              | N                       | 37   |

| No. | Year | Material                                                         | N-based material | Electrolyte                           | <i>E</i> (V vs. RHE) | FE (%) | Yield rate (nmol s <sup>-1</sup> cm <sup>-2</sup> ) | Quantitative <sup>15</sup> N <sub>2</sub> test | NO <sub>x</sub> control | Ref. |
|-----|------|------------------------------------------------------------------|------------------|---------------------------------------|----------------------|--------|-----------------------------------------------------|------------------------------------------------|-------------------------|------|
| 38  | 2018 | FeOOH                                                            | N                | 0.5 M LiClO <sub>4</sub>              | -0.75                | 6.7    | 0.076                                               | N                                              | N                       | 38   |
| 39  | 2018 | α-Fe <sub>2</sub> O <sub>3</sub>                                 | N                | 0.1 M KOH                             | -0.9 vs AgCl         | 8.3    | 0.024                                               | N                                              | N                       | 39   |
| 40  | 2018 | MoO <sub>3</sub>                                                 | N                | 0.1 M HCl                             | -0.5                 | 1.9    | 0.48                                                | N                                              | N                       | 40   |
| 41  | 2018 | B-graphene                                                       | N                | 0.05 M H <sub>2</sub> SO <sub>4</sub> | -0.5                 | 11     | 0.16                                                | N                                              | N                       | 41   |
| 42  | 2018 | Rh                                                               | Y                | 0.1 M KOH                             | -0.2                 | 0.20   | 0.13                                                | N                                              | N                       | 42   |
| 43  | 2018 | CN <sub>x</sub>                                                  | Y                | 0.05 M H <sub>2</sub> SO <sub>4</sub> | -0.9                 | 1.4    | 0.29                                                | N                                              | N                       | 43   |
| 44  | 2018 | Bi <sub>4</sub> V <sub>2</sub> O <sub>11</sub> /CeO <sub>2</sub> | Y                | 0.1 M HCl                             | -0.2                 | 10     | 0.76                                                | N                                              | N                       | 44   |
| 45  | 2018 | CN <sub>x</sub>                                                  | Y                | 0.1 M KOH                             | -0.3                 | 10     | 0.94                                                | N                                              | N                       | 45   |
| 46  | 2018 | Mo <sub>2</sub> C/C                                              | N                | 0.5 M Li <sub>2</sub> SO <sub>4</sub> | -0.3                 | 7.8    | 0.18 nmol s <sup>-1</sup> mg <sup>-1</sup>          | N                                              | N                       | 46   |
| 47  | 2018 | Au                                                               | Y                | 0.5 M LiClO <sub>4</sub>              | -0.5                 | 15     | 0.064                                               | N                                              | N                       | 47   |
| 48  | 2018 | CN <sub>x</sub>                                                  | Y                | 0.25 M LiClO <sub>4</sub>             | -1.2                 | 11     | 0.16                                                | N                                              | N                       | 48   |
| 49  | 2018 | MoS <sub>2</sub>                                                 | Y                | 0.1 M Na <sub>2</sub> SO <sub>4</sub> | -0.5                 | 1.2    | 0.081                                               | N                                              | N                       | 49   |
| 50  | 2018 | Au/CN <sub>x</sub>                                               | Y                | 0.1 M HCl                             | -0.1                 | 22     | 0.59                                                | N                                              | N                       | 50   |
| 51  | 2018 | C <sub>3</sub> N <sub>4</sub>                                    | Y                | 0.1 M HCl                             | -0.2                 | 12     | 0.26                                                | N                                              | N                       | 51   |
| 52  | 2018 | Mo <sub>2</sub> N                                                | Y                | 0.1 M HCl                             | -0.3                 | 4.5    | 1.2 nmol s <sup>-1</sup> mg <sup>-1</sup>           | N                                              | N                       | 52   |
| 53  | 2019 | LiMn <sub>2</sub> O <sub>4</sub>                                 | Y                | 0.1 M HCl                             | -0.5                 | 7.4    | 0.052                                               | N                                              | N                       | 53   |
| 54  | 2019 | CoS <sub>x</sub> /CN <sub>x</sub>                                | Y                | 0.05 M H <sub>2</sub> SO <sub>4</sub> | -0.2                 | 6.5    | 0.082                                               | N                                              | N                       | 54   |
| 55  | 2019 | TiO <sub>2</sub>                                                 | N                | 0.1 M HCl                             | -0.12                | 6.5    | 0.059                                               | N                                              | N                       | 55   |
| 56  | 2019 | CoO                                                              | N                | 0.1 M Na <sub>2</sub> SO <sub>4</sub> | -0.6                 | 8.3    | 0.096                                               | Y                                              | N                       | 56   |

| No. | Year | Material                                          | N-based material | Electrolyte                           | <i>E</i> (V vs. RHE) | FE (%) | Yield rate (nmol s <sup>-1</sup> cm <sup>-2</sup> ) | Quantitative <sup>15</sup> N <sub>2</sub> test | NO <sub>x</sub> control | Ref. |
|-----|------|---------------------------------------------------|------------------|---------------------------------------|----------------------|--------|-----------------------------------------------------|------------------------------------------------|-------------------------|------|
| 57  | 2019 | NiO/graphene                                      | N                | 0.1 M Na <sub>2</sub> SO <sub>4</sub> | -0.7                 | 7.8    | 0.061                                               | N                                              | N                       | 57   |
| 58  | 2019 | Fe <sub>3</sub> C/CN <sub>x</sub>                 | Y                | 0.1 M KOH                             | -0.4                 | 2.7    | 0.10                                                | N                                              | N                       | 58   |
| 59  | 2019 | B                                                 | N                | 0.1 M HCl                             | -0.14                | 4.8    | 0.051                                               | N                                              | N                       | 59   |
| 60  | 2019 | Ta <sub>2</sub> O <sub>5</sub>                    | Y                | 0.1 M HCl                             | -0.7                 | 8.9    | 0.26                                                | N                                              | N                       | 60   |
| 61  | 2019 | Mo/CN <sub>x</sub>                                | Y                | 0.1 M KOH                             | -0.3                 | 15     | 0.56                                                | Y                                              | N                       | 61   |
| 62  | 2019 | FePc                                              | Y                | 0.1 M Na <sub>2</sub> SO <sub>4</sub> | -0.3                 | 111    | 2.3                                                 | N                                              | N                       | 62   |
| 63  | 2019 | W <sub>2</sub> N <sub>3</sub>                     | Y                | 0.1 M KOH                             | -0.2                 | 12     | 0.038                                               | N                                              | N                       | 63   |
| 64  | 2019 | TiN                                               | Y                | 0.1 M Na <sub>2</sub> SO <sub>4</sub> | -0.6                 | 9.1    | 0.33                                                | Y                                              | N                       | 64   |
| 65  | 2019 | PdCuI <sub>r</sub>                                | N                | 0.1 M Na <sub>2</sub> SO <sub>4</sub> | -0.3                 | 5.3    | 0.088                                               | N                                              | N                       | 65   |
| 66  | 2019 | C-Ti <sub>x</sub> O <sub>y</sub> /C               | N                | 0.1 M LiClO <sub>4</sub>              | -0.4                 | 18     | 0.15                                                | Y                                              | N                       | 66   |
| 67  | 2019 | Bi                                                | Y                | 0.1 M Na <sub>2</sub> SO <sub>4</sub> | -0.8                 | 11     | 0.042                                               | N                                              | N                       | 67   |
| 68  | 2019 | MoS <sub>2</sub> /rGO                             | Y                | 0.1 M LiClO <sub>4</sub>              | -0.45                | 4.6    | 0.041                                               | N                                              | N                       | 68   |
| 69  | 2019 | γ-Fe <sub>2</sub> O <sub>3</sub> /CN <sub>x</sub> | Y                | 0.1 M HCl                             | -0.1                 | 12     | 1.2                                                 | N                                              | N                       | 69   |
| 70  | 2019 | B-COF                                             | Y                | 0.1 M KOH                             | -0.2                 | 45     | 0.21                                                | Y                                              | Y                       | 70   |
| 71  | 2019 | S-rich MoS <sub>2</sub>                           | Y                | 0.1 M Li <sub>2</sub> SO <sub>4</sub> | -0.2                 | 9.8    | 7.1                                                 | Y                                              | N                       | 71   |
| 72  | 2019 | Ti <sub>3</sub> C <sub>2</sub> T <sub>x</sub>     | N                | 0.5 M Li <sub>2</sub> SO <sub>4</sub> | -0.1                 | 4.6    | 0.077                                               | N                                              | N                       | 72   |
| 73  | 2019 | Fe <sub>2</sub> O <sub>3</sub> /TiO <sub>2</sub>  | Y                | 1 M KOH                               | -0.577               | 0.30   | 2.7                                                 | N                                              | N                       | 73   |
| 74  | 2019 | Pd <sub>3</sub> Cu <sub>1</sub>                   | Y                | 1 M KOH                               | -0.25                | 1.2    | 0.13                                                | N                                              | N                       | 74   |
| 75  | 2019 | Mo <sub>2</sub> C                                 | Y                | 0.1 M HCl                             | -0.3                 | 8.1    | 0.62                                                | N                                              | N                       | 75   |

| No. | Year | Material                                      | N-based material | Electrolyte                            | <i>E</i> (V vs. RHE) | FE (%) | Yield rate (nmol s <sup>-1</sup> cm <sup>-2</sup> ) | Quantitative <sup>15</sup> N <sub>2</sub> test | NO <sub>x</sub> control | Ref. |
|-----|------|-----------------------------------------------|------------------|----------------------------------------|----------------------|--------|-----------------------------------------------------|------------------------------------------------|-------------------------|------|
| 76  | 2019 | CN <sub>x</sub> P <sub>y</sub>                | Y                | 0.1 M HCl                              | -0.2                 | 4.2    | 0.13                                                | N                                              | N                       | 76   |
| 77  | 2019 | Ru/CN <sub>x</sub>                            | Y                | 0.1 M HCl                              | -0.21                | 7.5    | 0.060                                               | N                                              | N                       | 77   |
| 78  | 2019 | CuO/rGO                                       | N                | 0.1 M Na <sub>2</sub> SO <sub>4</sub>  | -0.75                | 3.9    | 0.18                                                | N                                              | N                       | 78   |
| 79  | 2019 | PdRu                                          | N                | 0.1 M HCl                              | -0.2                 | 2.4    | 0.36                                                | N                                              | N                       | 79   |
| 80  | 2019 | Au                                            | N                | 0.1 M Na <sub>2</sub> SO <sub>4</sub>  | -0.2                 | 13     | 0.15                                                | N                                              | N                       | 80   |
| 81  | 2019 | Fe/CN <sub>x</sub>                            | Y                | 0.1 M KOH                              | 0                    | 57     | 0.12                                                | Y                                              | N                       | 81   |
| 82  | 2019 | Bi                                            | Y                | 0.2 M Na <sub>2</sub> SO <sub>4</sub>  | -0.6                 | 12     | 0.045                                               | Y                                              | N                       | 82   |
| 83  | 2019 | MnO                                           | N                | 0.1 M Na <sub>2</sub> SO <sub>4</sub>  | -0.39                | 8      | 0.11                                                | N                                              | N                       | 83   |
| 84  | 2019 | K <sub>2</sub> Ti <sub>4</sub> O <sub>9</sub> | N                | 0.1 M KOH                              | -0.5                 | 5.9    | 0.037                                               | N                                              | N                       | 84   |
| 85  | 2019 | Cr <sub>2</sub> O <sub>3</sub> /rGO           | N                | 0.1 M HCl                              | -0.7                 | 3.5    | 0.054                                               | N                                              | N                       | 85   |
| 86  | 2019 | La <sub>2</sub> O <sub>3</sub>                | N                | 0.1 M Na <sub>2</sub> SO <sub>4</sub>  | -0.8                 | 4.8    | 0.022                                               | N                                              | N                       | 86   |
| 87  | 2019 | Co/CN <sub>x</sub>                            | Y                | 0.1 M Na <sub>2</sub> SO <sub>4</sub>  | -0.7                 | 22     | 0.16                                                | N                                              | N                       | 87   |
| 88  | 2019 | Ag <sub>3</sub> Cu                            | Y                | 0.1 M Na <sub>2</sub> SO <sub>4</sub>  | -0.5                 | 13     | 0.16                                                | N                                              | N                       | 88   |
| 89  | 2019 | MoO <sub>2</sub>                              | N                | 0.1 M HCl                              | -0.15                | 8.2    | 0.20                                                | N                                              | N                       | 89   |
| 90  | 2019 | Black P                                       | N                | 0.01 M HCl                             | -0.7                 | 3.1    | 0.10                                                | Y                                              | N                       | 90   |
| 91  | 2019 | B                                             | N                | 0.1 M Na <sub>2</sub> SO <sub>4</sub>  | -0.8                 | 4.0    | 0.022                                               | N                                              | N                       | 91   |
| 92  | 2019 | BN                                            | Y                | 0.01 M HCl                             | -0.75                | 4.7    | 0.037                                               | N                                              | N                       | 92   |
| 93  | 2019 | CN <sub>x</sub>                               | Y                | 0.005 M H <sub>2</sub> SO <sub>4</sub> | -0.4                 | 10     | 0.36                                                | N                                              | N                       | 93   |
| 94  | 2019 | F-Graphene                                    | N                | 0.1 M Na <sub>2</sub> SO <sub>4</sub>  | -0.7                 | 4.2    | 0.030                                               | N                                              | N                       | 94   |

| No. | Year | Material                              | N-based material | Electrolyte                           | <i>E</i> (V vs. RHE) | FE (%) | Yield rate (nmol s <sup>-1</sup> cm <sup>-2</sup> ) | Quantitative <sup>15</sup> N <sub>2</sub> test | NO <sub>x</sub> control | Ref. |
|-----|------|---------------------------------------|------------------|---------------------------------------|----------------------|--------|-----------------------------------------------------|------------------------------------------------|-------------------------|------|
| 95  | 2019 | Au/CoO <sub>x</sub>                   | N                | 0.05 M H <sub>2</sub> SO <sub>4</sub> | -0.5                 | 19     | 0.25                                                | N                                              | N                       | 95   |
| 96  | 2019 | AuNi                                  | Y                | 0.05 M H <sub>2</sub> SO <sub>4</sub> | -0.14                | 68     | 0.24                                                | N                                              | N                       | 96   |
| 97  | 2019 | Bi                                    | Y                | 0.5 M K <sub>2</sub> SO <sub>4</sub>  | -0.6                 | 66     | 14                                                  | Y                                              | N                       | 97   |
| 98  | 2019 | Au/C                                  | N                | 0.5 M K <sub>2</sub> SO <sub>4</sub>  | -0.3                 | 23     | 0.33                                                | N                                              | N                       | 97   |
| 99  | 2019 | Pt/C                                  | N                | 0.5 M K <sub>2</sub> SO <sub>4</sub>  | -0.025               | 1.0    | 0.033                                               | N                                              | N                       | 97   |
| 100 | 2019 | CoS/TiO <sub>2</sub>                  | Y                | 0.1 M Na <sub>2</sub> SO <sub>4</sub> | -0.55                | 29     | 0.81                                                | N                                              | Y                       | 98   |
| 101 | 2019 | N-NiO/C                               | Y                | 0.1 M LiClO <sub>4</sub>              | -0.5                 | 7.3    | 0.19                                                | Y                                              | N                       | 99   |
| 102 | 2019 | Fe <sub>3</sub> Mo <sub>3</sub> C/C   | N                | 1 M KOH                               | -0.5                 | 0.30   | 0.21                                                | N                                              | N                       | 100  |
| 103 | 2019 | SnS <sub>2</sub> /Ni                  | Y                | 0.1 M Na <sub>2</sub> SO <sub>4</sub> | -0.5                 | 11     | 0.92                                                | N                                              | N                       | 101  |
| 104 | 2019 | Au/Boron organic polymer              | Y                | 0.1 M HCl                             | -0.2                 | 10     | 0.74                                                | N                                              | N                       | 102  |
| 105 | 2019 | Cu/CN <sub>x</sub>                    | Y                | 0.1 M KOH                             | -0.35                | 14     | 0.87                                                | N                                              | N                       | 103  |
| 106 | 2019 | Pd <sub>3</sub> Pb                    | Y                | 0.1 M Na <sub>2</sub> SO <sub>4</sub> | -0.2                 | 22     | 0.060                                               | N                                              | N                       | 104  |
| 107 | 2019 | Cl-graphdiyne                         | N                | 0.1 M HCl                             | -0.45                | 8.7    | 0.18                                                | N                                              | N                       | 105  |
| 108 | 2019 | rGO/Fe/Fe <sub>3</sub> O <sub>4</sub> | Y                | 0.2 M NaHCO <sub>3</sub>              | -0.3                 | 6.3    | 0.13                                                | N                                              | N                       | 106  |
| 109 | 2019 | CoFe <sub>2</sub> O <sub>4</sub>      | N                | 0.1 M Na <sub>2</sub> SO <sub>4</sub> | -0.4                 | 6.2    | 0.042                                               | N                                              | N                       | 107  |
| 110 | 2019 | Cu/Polyimide                          | Y                | 0.1 M KOH                             | -0.3                 | 6.6    | 0.20                                                | N                                              | N                       | 108  |
| 111 | 2019 | O-CNT                                 | Y                | 0.1 M HCl                             | -0.6                 | 5.0    | 0.033                                               | N                                              | N                       | 109  |
| 112 | 2019 | PdCu                                  | Y                | 0.5 M LiCl                            | -0.1                 | 12     | 0.58                                                | N                                              | Y                       | 110  |
| 113 | 2019 | Co-doped FePS <sub>3</sub>            | N                | 0.1 M KOH                             | -0.4                 | 3.4    | 0.24                                                | N                                              | N                       | 111  |



| No. | Year | Material                           | N-based material | Electrolyte                           | <i>E</i> (V vs. RHE) | FE (%) | Yield rate (nmol s <sup>-1</sup> cm <sup>-2</sup> ) | Quantitative <sup>15</sup> N <sub>2</sub> test | NO <sub>x</sub> control | Ref. |
|-----|------|------------------------------------|------------------|---------------------------------------|----------------------|--------|-----------------------------------------------------|------------------------------------------------|-------------------------|------|
| 114 | 2019 | Au                                 | Y                | 0.1 M Li <sub>2</sub> SO <sub>4</sub> | -0.3                 | 73     | 0.15                                                | N                                              | N                       | 112  |
| 115 | 2019 | CN <sub>x</sub> /NiO/Graphite      | Y                | 0.1 M HCl                             | -0.2                 | 30     | 0.12                                                | N                                              | N                       | 113  |
| 116 | 2019 | Fe <sub>3</sub> C/C                | Y                | 0.05 M H <sub>2</sub> SO <sub>4</sub> | -0.2                 | 9.2    | 0.21                                                | N                                              | N                       | 114  |
| 117 | 2019 | Fe-doped TiO <sub>2</sub>          | N                | 0.5 M LiClO <sub>4</sub>              | -0.4                 | 26     | 0.042                                               | N                                              | N                       | 115  |
| 118 | 2019 | P/SnO <sub>2-x</sub>               | N                | 0.1 M Na <sub>2</sub> SO <sub>4</sub> | -0.4                 | 15     | 0.080                                               | Y                                              | Y                       | 116  |
| 119 | 2019 | RuMoS <sub>2</sub>                 | N                | 0.01 M HCl                            | -0.2                 | 18     | 0.067                                               | Y                                              | N                       | 117  |
| 120 | 2020 | NbSe <sub>2</sub>                  | Y                | 0.1 M Na <sub>2</sub> SO <sub>4</sub> | -0.45                | 7.0    | 1.5                                                 | Y                                              | N                       | 118  |
| 121 | 2020 | Au/Fe <sub>3</sub> O <sub>4</sub>  | Y                | 0.1 M KOH                             | -0.2                 | 11     | 0.18                                                | Y                                              | N                       | 119  |
| 122 | 2020 | IrTe <sub>4</sub>                  | Y                | 0.1 M KOH                             | -0.2                 | 15     | 0.83                                                | Y                                              | N                       | 120  |
| 123 | 2020 | CN <sub>x</sub> B <sub>y</sub>     | Y                | 0.1 M HCl                             | -0.2                 | 11     | 0.27                                                | N                                              | N                       | 121  |
| 124 | 2020 | Mo/FeS <sub>2</sub>                | Y                | 0.1 M KOH                             | -0.2                 | 14     | 0.41 nmol s <sup>-1</sup> mg <sup>-1</sup>          | Y                                              | N                       | 122  |
| 125 | 2020 | W <sub>18</sub> O <sub>4</sub> /Fe | N                | 0.25 M LiClO <sub>4</sub>             | -0.15                | 20     | 0.40 nmol s <sup>-1</sup> mg <sup>-1</sup>          | N                                              | N                       | 123  |
| 126 | 2020 | CN <sub>x</sub>                    | Y                | 0.1 M HCl                             | -0.1                 | 62     | 0.041                                               | Y                                              | N                       | 124  |
| 127 | 2020 | Fe/SnO <sub>2</sub>                | Y                | 0.1 M HCl                             | -0.3                 | 20     | 14                                                  | Y                                              | N                       | 125  |

#### Colour codes:

**Green:** High yield rate  $\geq 10$  nmol s<sup>-1</sup> cm<sup>-2</sup>; key experiments executed according to protocols with clearly outlined experimental details.

**Orange:** Moderate yield rate between 0.1-10 nmol s<sup>-1</sup> cm<sup>-2</sup>; partial provision of the required key experiments, e.g. incomplete quantification of NO<sub>x</sub>, <sup>15</sup>NRR experiment under single set of conditions only with no time dependence.

**Red:** Low yield rate  $< 0.1$  nmol s<sup>-1</sup> cm<sup>-2</sup>; key experiments and/or experimental details missing; fundamental flaws in the experimental procedures, e.g. identifiable H/D exchange in the analysis of <sup>15</sup>NH<sub>3</sub> by <sup>1</sup>H-NMR.

**Supplementary Table 2.** Summary of non-aqueous NRR results reported between 1987 and 2020.

| No. | Year | Material                                    | N-based material | Electrolyte                                                              | E (V)                | FE (%) | Yield rate (nmol s <sup>-1</sup> cm <sup>-2</sup> ) | Quantitative <sup>15</sup> N <sub>2</sub> test | NO <sub>x</sub> control | Ref. |
|-----|------|---------------------------------------------|------------------|--------------------------------------------------------------------------|----------------------|--------|-----------------------------------------------------|------------------------------------------------|-------------------------|------|
| 1   | 1987 | 0.05 M Cp <sub>2</sub> TiCl <sub>2</sub>    | N                | 0.25 M LiClO <sub>4</sub> in MeOH + 0.25 M catechol/Mg(OAc) <sub>2</sub> | -2.2 vs. Ag wire     | 2      | 1.0                                                 | N                                              | N                       | 126  |
| 2   | 1988 | 0.12 M VOSO <sub>4</sub> ·5H <sub>2</sub> O | N                | H <sub>2</sub> SO <sub>4</sub> + MeOH / catechol/methoxide               | -1.7 vs. Ag wire     | -      | 1.5                                                 | N                                              | N                       | 127  |
| 3   | 1993 | Cu                                          | N                | 0.2 M LiClO <sub>4</sub> in THF : EtOH                                   | < -4.0 vs. AgCl      | 49     | 1.7                                                 | *                                              | N                       | 128  |
| 4   | 1994 | Cu                                          | N                | 0.2 M LiOTf in THF : EtOH                                                | < -4.0 vs. AgCl      | 60     | 2.1                                                 | *                                              | N                       | 129  |
| 5   | 2016 | Ni                                          | N                | 2-propanol H <sub>2</sub> O                                              | 3.8 V (cell voltage) | 0.9    | 0.015                                               | N                                              | N                       | 130  |
| 6   | 2016 | Ni                                          | Y                | 0.1 M LiCl in Ethylenediamine                                            | 1.8 V (cell voltage) | 17     | 0.35                                                | N                                              | N                       | 131  |
| 7   | 2016 | Cp <sub>2</sub> TiCl <sub>2</sub>           | Y                | [C <sub>4</sub> mpyr] [eFAP]                                             | -1.5 vs. AgCl        | 0.2    | 69 nmol cm <sup>-2</sup>                            | N                                              | N                       | 132  |
| 8   | 2017 | Fe                                          | N                | [P <sub>66614</sub> ] [eFAP]                                             | -0.8 vs. NHE         | 60     | 0.005                                               | Y                                              | Y                       | 133  |
| 9   | 2018 | Ag-Au-ZIF                                   | Y                | 0.2 M LiOTf in THF:EtOH                                                  | -2.9 vs. AgCl        | 18     | 0.01                                                | N                                              | N                       | 134  |
| 10  | 2018 | Fe-Fe <sub>2</sub> O <sub>3</sub>           | Y                | [C <sub>4</sub> mpyr] [eFAP] : FPEE                                      | -0.6 vs. NHE         | 32     | 0.24                                                | N                                              | Y                       | 135  |
| 11  | 2019 | Cu                                          | N                | 0.2 M LiBF <sub>4</sub> in THF : EtOH                                    | 15 V (cell voltage)  | 19     | 7.9                                                 | *                                              | N                       | 136  |
| 12  | 2019 | Mo                                          | N                | 0.2 M LiClO <sub>4</sub> in THF : EtOH                                   | -3.1 vs. AgCl        | 8      | 0.22                                                | Y                                              | Y                       | 137  |
| 13  | 2020 | Mo                                          | N                | 0.5 M LiClO <sub>4</sub> in THF : EtOH                                   | -3.8 V vs. Pt pseudo | 6      | 0.22                                                | *                                              | N                       | 138  |
| 14  | 2020 | Cu                                          | N                | 0.2 M LiBF <sub>4</sub> in THF : EtOH                                    | 30 V (cell voltage)  | 35     | 30                                                  | Y                                              | Y                       | 139  |
| 15  | 2020 | Ag-ZIF-Oleylamine                           | Y                | 0.2 M LiOTf in THF : BuOH : H <sub>2</sub> O                             | -2.9 vs. AgCl        | 18     | 0.74 nmol s <sup>-1</sup> mg <sup>-1</sup>          | N                                              | N                       | 140  |
| 16  | 2020 | Pt-Au-ZIF                                   | Y                | 0.2 M LiOTf in THF : EtOH                                                | -2.9 vs. AgCl        | 44     | 2.6 nmol s <sup>-1</sup> mg <sup>-1</sup>           | N                                              | N                       | 141  |

Major colour codes are as in Supplementary Table 2

\* Relies on relevant and adequate data reported in other published studies on the same system.

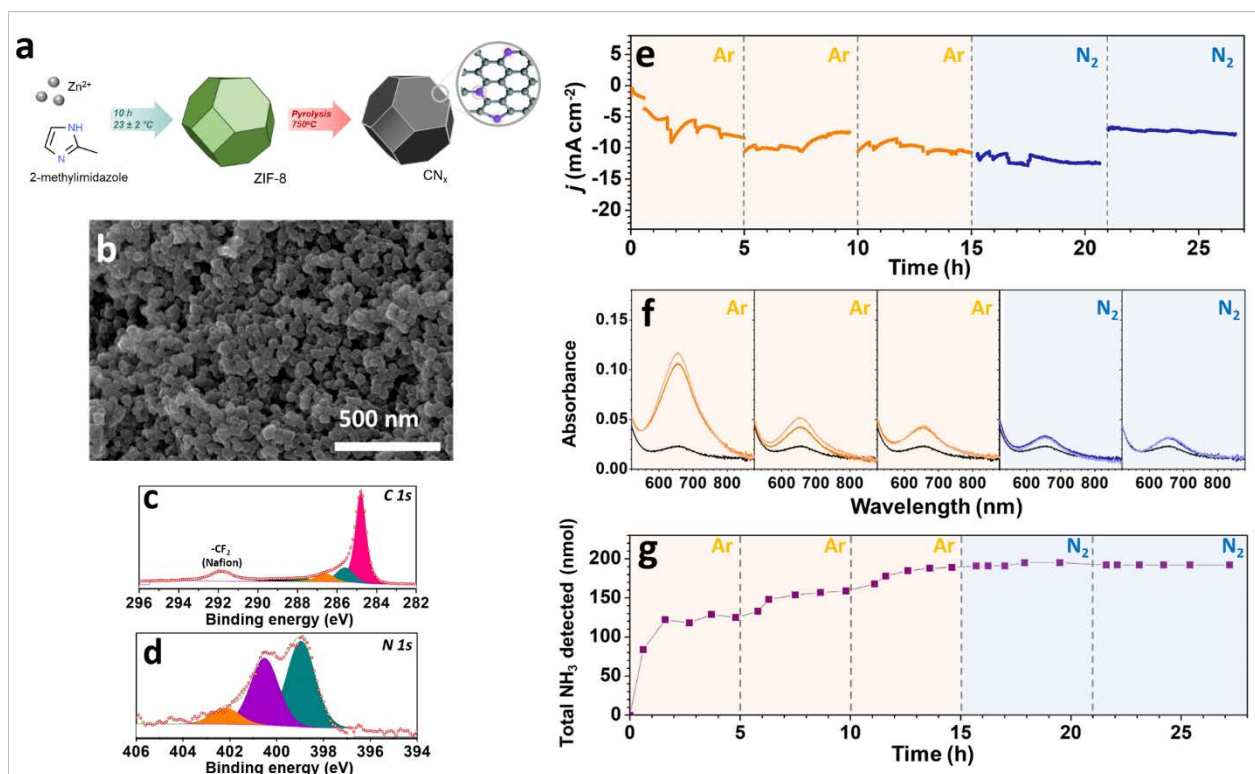

### Supplementary Figure 1. Synthesis, characterisation and testing of $\text{CN}_x$ materials.

**a** Schematic of the synthesis of  $\text{CN}_x$ . Zeolite imidazole framework-8 was synthesised according to standard literature methods: 2-methylimidazole (3.15 g) and polyvinylpyrrolidone (1.25 g) were dissolved in 50 mL ethanol and vigorously stirred for 1 h under ambient conditions, 3.6 g  $\text{Zn}(\text{NO}_3)_2$  dissolved in 50 ml ethanol was then added dropwise, and the mixture was kept at ambient temperature for *ca* 10 h to allow for the formation of a precipitate, which was collected by centrifugation and washed twice with ethanol (50 mL); dried ZIF-8 was calcined in 5%  $\text{H}_2$  in Argon at 750 °C for 5 h (heating ramp 7.5 °C  $\text{min}^{-1}$ ) to produce  $\text{CN}_x$ . **b** Scanning electron micrograph of  $\text{CN}_x$ . **c-d** X-ray photoelectron spectroscopic analysis of  $\text{CN}_x$ : C 1s and N 1s experimental spectra and plausible fitting. The high-resolution N 1s spectrum reveals a total of 4.9 at.% of N-containing functional groups were present. Peaks were fitted with three components assigned to pyridinic-N (*teal*), pyrrolic-N (*purple*), and graphitic-N (*orange*). Particularly, the presence of pyridinic-N, which is described in the literature as the NRR active site, is confirmed by the fitted peak centred at 399.0 eV to be present in atomic abundance of 2.5 at.%. This level of pyridinic N-content is comparable to the amounts reported for the materials in Supplementary Table 1 references 43 and 45. **e** Chronoamperograms recorded with the carbon fibre paper electrode (2.0  $\text{cm}^2$  geometric surface area) modified with 1.2  $\text{mg cm}^{-2}$  of  $\text{CN}_x$  in 0.05 M  $\text{H}_2\text{SO}_4(\text{aq})$ . A series of sequential tests were undertaken under Ar atmosphere (*orange*) at -0.9 V vs.  $\text{Ag}|\text{AgCl}|\text{KCl}_{\text{sat.}}$ ; further, the solution was saturated with  $\text{N}_2$  and tests were continued at -1.1 V and -0.9 V vs.  $\text{Ag}|\text{AgCl}|\text{KCl}_{\text{sat.}}$  (*blue*). **f** Spectrophotometric detection of ammonia using Berthelot method during tests under Ar (*orange*) and  $\text{N}_2$  (*blue*) shown in panel **e** compared to the blank untreated solution (*black*). **g** Amount of  $\text{NH}_3$  detected during experiments shown in panel **e**.

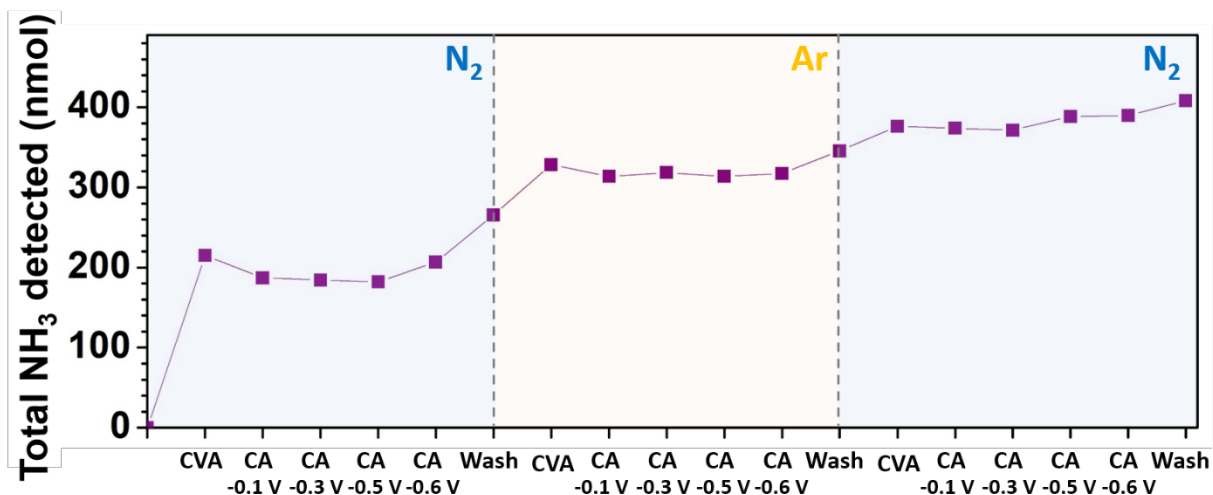

**Supplementary Figure 2. Ammonia generation by a vanadium nitride electrode.** Total NH<sub>3</sub> produced at each stage of a continuous experiment involving electroreduction of 0.05 M H<sub>2</sub>SO<sub>4</sub> aqueous solution with a VN-modified carbon fibre electrode under N<sub>2</sub> (*light blue shading*) and Ar atmosphere (*light yellow shading*). CVA – cyclic voltammetry from 0 to -0.8 V vs. RHE at 0.020 V s<sup>-1</sup>; CA – chronoamperometry for 2 h at a given potential vs. RHE; Wash – amount of NH<sub>3</sub> stripped off the electrode using 0.05 M H<sub>2</sub>SO<sub>4</sub> solution after electrochemical tests. Further experimental details can be found in [ACS Sustainable Chem. Eng. 7, 6839-6850 (2019); DOI: 10.1021/acssuschemeng.8b06163].

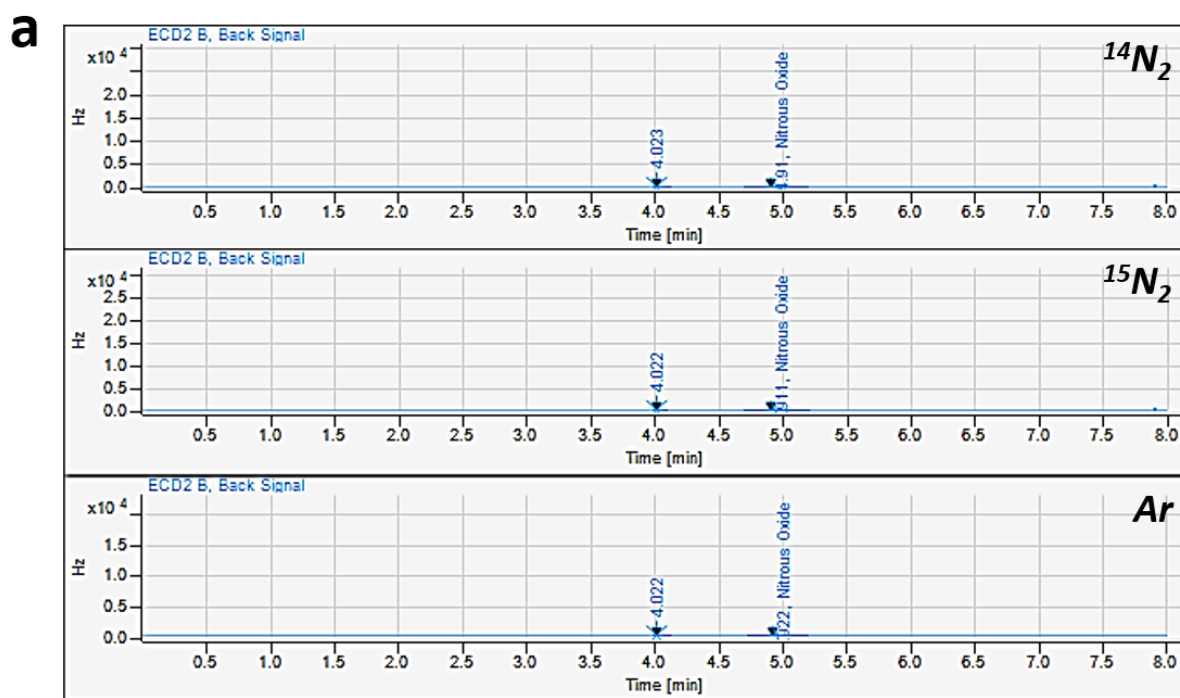

**Supplementary Figure 3. N<sub>2</sub>O content in <sup>14</sup>N<sub>2</sub>, <sup>15</sup>N<sub>2</sub> and Ar gas supplies.** **a** Raw unprocessed gas chromatograms for the analysis of N<sub>2</sub>O in different gasses; analysis details: Agilent 7890A instrument equipped with an 8 ft. HayeSep Q 80/100 mesh column (Agilent G3591-81047) and an electron coupled detector; N<sub>2</sub> carrier gas; 300 °C detector temperature; 2.5 mL injected volume. Prior to the analysis of gas samples, a standard mixture containing 1 ppm N<sub>2</sub>O, 5 ppm CH<sub>4</sub> and 615 ppm CO<sub>2</sub> in Ar was always analysed to confirm the calibration for N<sub>2</sub>O. For sampling, each gas was directly purged into a vacuum-evacuated gas-tight syringe; N<sub>2</sub>O measurement was then immediately carried out. **b** Summary of the gas specifications and N<sub>2</sub>O analysis results.

**Supplementary Table 3.** Potential NH<sub>3</sub> formation rates from N<sub>2</sub>O in flowing-gas and static volume, 4-hour<sup>a</sup> NRR experiments.

| Flow rate (mL min <sup>-1</sup> ) | N <sub>2</sub> purity <sup>b</sup> | Purging time (min)                                      | Moles N <sub>2</sub> <sup>c</sup> (μmol) | Moles N <sub>2</sub> O <sup>c</sup> (nmol) | NH <sub>3</sub> from N <sub>2</sub> O (nmol s <sup>-1</sup> ) |
|-----------------------------------|------------------------------------|---------------------------------------------------------|------------------------------------------|--------------------------------------------|---------------------------------------------------------------|
| 100                               | 0.2 ppm N <sub>2</sub> O           | 240                                                     | 9.84 × 10 <sup>8</sup>                   | 1.97 × 10 <sup>2</sup>                     | 0.014                                                         |
| 20                                | 0.2 ppm N <sub>2</sub> O           | 240                                                     | 1.97 × 10 <sup>8</sup>                   | 0.39 × 10 <sup>2</sup>                     | 0.003                                                         |
| 0                                 | 0.2 ppm N <sub>2</sub> O           | 15<br>(prior to experiment at 20 ml min <sup>-1</sup> ) | 2.23 × 10 <sup>7</sup>                   | 0.25 × 10 <sup>1</sup>                     | 0.0002                                                        |

<sup>a</sup> Arbitrarily assumed duration of a typical experiment. <sup>b</sup> The N<sub>2</sub>O impurity level in a 99.999% Ultra High Purity N<sub>2</sub> cylinder in our groups was detected by gas chromatography-electron coupled detector (NB: the detected level is well below the manufacturers specifications, further details in Supplementary Figure 3). <sup>c</sup> At 298 K and 1 atm.

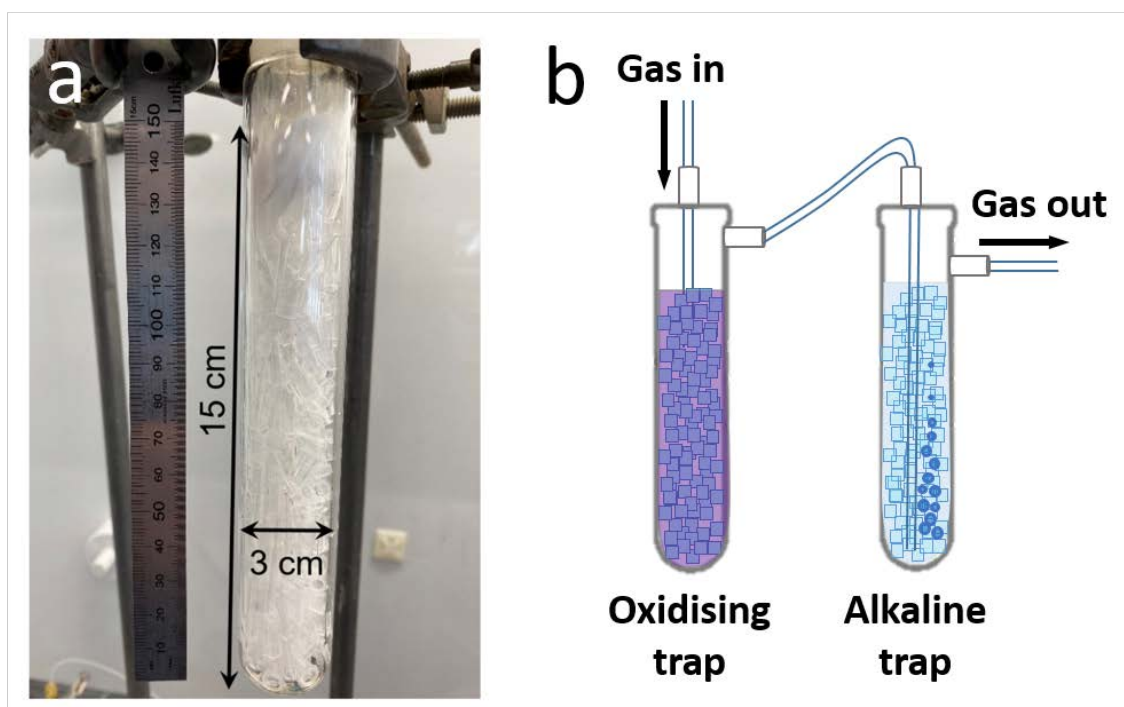

**Supplementary Figure 4. Setup for NO<sub>x</sub> scrubbing.** **a** Photograph of a body of a trap that is packed with path-blocking materials – glass wool and glass tube pieces. The height of the trap should be as long as possible to create a long, tortuous path for the bubbles through the packing materials. **b** Scheme of the NO<sub>x</sub> scrubbing setup with oxidising and alkaline traps connected in series. Any NO<sub>x</sub> breakthrough from the oxidising trap (filled with e.g. 0.1 M KMnO<sub>4</sub> in aqueous 0.1 M KOH) is captured by an alkaline trap (filled with e.g. aqueous 0.1 M KOH). Ideally, both traps should include a packing material to create a tortuous pathway for the bubbles, as shown in panel **a**. To determine whether any breakthrough of NO<sub>x</sub> species is occurring from the oxidising trap, no increase in NO<sub>3</sub><sup>-</sup> and NO<sub>2</sub><sup>-</sup> levels over background in the alkaline trap should be regularly confirmed and reported under NRR operating conditions. Otherwise, further improvement of the trap design, in the first place to increase the gas-liquid contact time, is required.

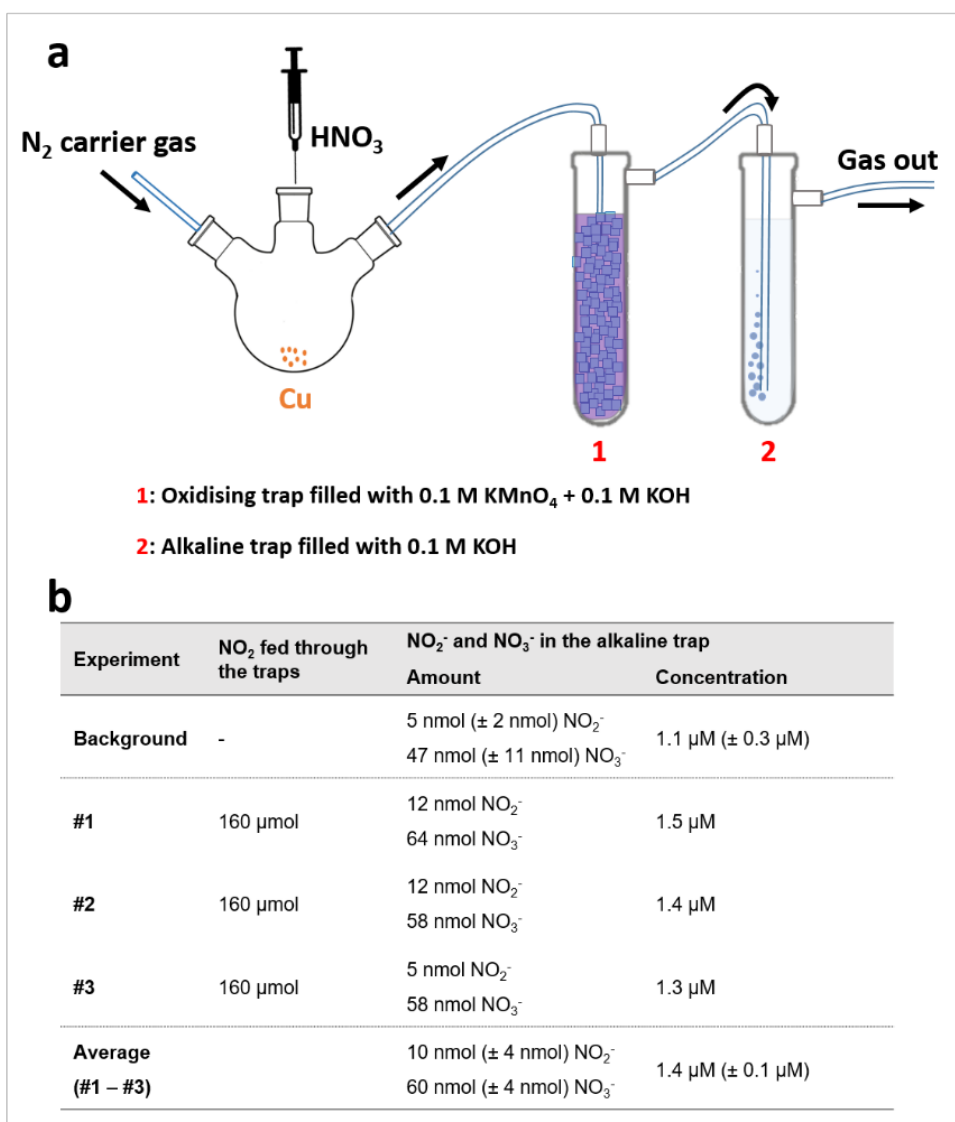

**Supplementary Figure 5. Experimental demonstration of  $\text{NO}_x$  scrubbing.** **a** Schematic diagram of the experimental setup:  $\text{NO}_2$  gas was produced by reacting copper powder (80  $\mu\text{mol}$ ) and concentrated nitric acid (0.1 mL, ca 1.6 mol  $\text{HNO}_3$ ) in a sealed triple-neck round bottom flask installed into the gas supply line prior to the scrubbing setup, which included (1) the oxidising and (2) alkaline traps, as described in Supplementary Figure 4. As soon as all Cu was consumed, the produced  $\text{NO}_2$  gas (theoretically, 160  $\mu\text{mol}$ ) was introduced into the scrubbing system with an  $\text{N}_2$  carrier gas at a flow rate of 20 mL  $\text{min}^{-1}$ . After 30 min, an aliquot (0.50 mL) was withdrawn from the alkaline trap solution, and the amount of any breakthrough  $\text{NO}_2$  species was determined by Griess analysis. **b** Summary of the results for three independent  $\text{NO}_2$  scrubbing experiments, each undertaken with fresh solutions in both traps. Background levels of  $\text{NO}_2^-$  and  $\text{NO}_3^-$  in 0.1 M KOH trap solution were measured prior to the start of the experiment. Even though a very large amount of  $\text{NO}_2$  gas (theoretical 160  $\mu\text{mol}$ ) was injected into the system, the  $\text{NO}_x$  concentration measured in the alkaline scrubber solution remained within the range of the background level.



## Supplementary References

1. Köleli F, Kayan DB. Low overpotential reduction of dinitrogen to ammonia in aqueous media. *J. Electroanal. Chem.* **638**, 119-122 (2010).
2. Shi MM, *et al.* Au sub-nanoclusters on TiO<sub>2</sub> toward highly efficient and selective electrocatalyst for N<sub>2</sub> conversion to NH<sub>3</sub> at ambient conditions. *Adv. Mater.* **29**, 1606550 (2017).
3. Bao D, *et al.* Electrochemical reduction of N<sub>2</sub> under ambient conditions for artificial N<sub>2</sub> fixation and renewable energy storage using N<sub>2</sub>/NH<sub>3</sub> cycle. *Adv. Mater.* **29**, 1604799 (2017).
4. Li SJ, Bao D, Shi MM, Wulan BR, Yan JM, Jiang Q. Amorphizing of Au nanoparticles by CeO<sub>x</sub>-RGO hybrid support towards highly efficient electrocatalyst for N<sub>2</sub> reduction under ambient conditions. *Adv. Mater.* **29**, 1700001 (2017).
5. Kong J, *et al.* Electrochemical synthesis of NH<sub>3</sub> at low temperature and atmospheric pressure using a  $\gamma$ -Fe<sub>2</sub>O<sub>3</sub> catalyst. *ACS Sustainable Chem. Eng.* **5**, 10986-10995 (2017).
6. Chen S, Perathoner S, Ampelli C, Mebrahtu C, Su D, Centi G. Room-temperature electrocatalytic synthesis of NH<sub>3</sub> from H<sub>2</sub>O and N<sub>2</sub> in a gas-liquid-solid three-phase reactor. *ACS Sustainable Chem. Eng.* **5**, 7393-7400 (2017).
7. Chen S, Perathoner S, Ampelli C, Mebrahtu C, Su D, Centi G. Electrocatalytic synthesis of ammonia at room temperature and atmospheric pressure from water and nitrogen on a carbon-nanotube-based electrocatalyst. *Angew. Chem., Int. Ed.* **56**, 2699-2703 (2017).
8. Chen G-F, *et al.* Ammonia electrosynthesis with high selectivity under ambient conditions via a Li<sup>+</sup> incorporation strategy. *J. Am. Chem. Soc.* **139**, 9771-9774 (2017).
9. Yang D, Chen T, Wang Z. Electrochemical reduction of aqueous nitrogen (N<sub>2</sub>) at a low overpotential on (110)-oriented Mo nanofilm. *J. Mater. Chem. A* **5**, 18967-18971 (2017).
10. Zhao X, Yin F, Liu N, Li G, Fan T, Chen B. Highly efficient metal-organic-framework catalysts for electrochemical synthesis of ammonia from N<sub>2</sub> (air) and water at low temperature and ambient pressure. *J. Mater. Sci.* **52**, 10175-10185 (2017).
11. Wang D, *et al.* Energy-Efficient Nitrogen Reduction to Ammonia at Low Overpotential in Aqueous Electrolyte under Ambient Conditions. *ChemSusChem* **11**, 3416-3422 (2018).
12. Liu Q, *et al.* Ambient N<sub>2</sub> fixation to NH<sub>3</sub> electrocatalyzed by a spinel Fe<sub>3</sub>O<sub>4</sub> nanorod. *Nanoscale* **10**, 14386-14389 (2018).
13. Manjunatha R, Schechter A. Electrochemical synthesis of ammonia using ruthenium-platinum alloy at ambient pressure and low temperature. *Electrochem. Commun.* **90**, 96-100 (2018).
14. Shi MM, Bao D, Li SJ, Wulan BR, Yan JM, Jiang Q. Anchoring PdCu amorphous nanocluster on graphene for electrochemical reduction of N<sub>2</sub> to NH<sub>3</sub> under ambient conditions in aqueous solution. *Adv. Energy Mater.* **8**, 1800124 (2018).
15. Wang J, Yu L, Hu L, Chen G, Xin H, Feng X. Ambient ammonia synthesis via palladium-catalyzed electrohydrogenation of dinitrogen at low overpotential. *Nat. Commun.* **9**, 1-7 (2018).

16. Du H, Guo X, Kong R-M, Qu F. Cr<sub>2</sub>O<sub>3</sub> nanofiber: a high-performance electrocatalyst toward artificial N<sub>2</sub> fixation to NH<sub>3</sub> under ambient conditions. *Chem. Commun.* **54**, 12848-12851 (2018).
17. Geng Z, *et al.* Achieving a Record-High Yield Rate of 120.9 for N<sub>2</sub> Electrochemical Reduction over Ru Single-Atom Catalysts. *Adv. Mater.* **30**, 1803498 (2018).
18. Han J, *et al.* Ambient N<sub>2</sub> fixation to NH<sub>3</sub> at ambient conditions: Using Nb<sub>2</sub>O<sub>5</sub> nanofiber as a high-performance electrocatalyst. *Nano Energy* **52**, 264-270 (2018).
19. Hu L, Khaniya A, Wang J, Chen G, Kaden WE, Feng X. Ambient electrochemical ammonia synthesis with high selectivity on Fe/Fe oxide catalyst. *ACS Catal.* **8**, 9312-9319 (2018).
20. Huang H, Xia L, Shi X, Asiri AM, Sun X. Ag nanosheets for efficient electrocatalytic N<sub>2</sub> fixation to NH<sub>3</sub> under ambient conditions. *Chem. Commun.* **54**, 11427-11430 (2018).
21. Li W, *et al.* Nitrogen-free commercial carbon cloth with rich defects for electrocatalytic ammonia synthesis under ambient conditions. *Chem. Commun.* **54**, 11188-11191 (2018).
22. Huang L, *et al.* NbO<sub>2</sub> electrocatalyst toward 32% Faradaic efficiency for N<sub>2</sub> fixation. *Small Methods* **3**, 1800386 (2019).
23. Li X, *et al.* Enabling Electrocatalytic N<sub>2</sub> Reduction to NH<sub>3</sub> by Y<sub>2</sub>O<sub>3</sub> Nanosheet under Ambient Conditions. *Ind. Eng. Chem. Res.* **57**, 16622-16627 (2018).
24. Li X, *et al.* Boosted electrocatalytic N<sub>2</sub> reduction to NH<sub>3</sub> by defect-rich MoS<sub>2</sub> nanoflower. *Adv. Energy Mater.* **8**, 1801357 (2018).
25. Qin Q, Heil T, Antonietti M, Oschatz M. Single-Site Gold Catalysts on Hierarchical N-Doped Porous Noble Carbon for Enhanced Electrochemical Reduction of Nitrogen. *Small Methods* **2**, 1800202 (2018).
26. Wang X, *et al.* Atomically dispersed Au<sup>1</sup> catalyst towards efficient electrochemical synthesis of ammonia. *Sci. Bull.* **63**, 1246-1253 (2018).
27. Wang Y, *et al.* Rational design of Fe–N/C hybrid for enhanced nitrogen reduction electrocatalysis under ambient conditions in aqueous solution. *ACS Catal.* **9**, 336-344 (2018).
28. Wang Y, *et al.* Boron-doped TiO<sub>2</sub> for efficient electrocatalytic N<sub>2</sub> fixation to NH<sub>3</sub> at ambient conditions. *ACS Sustainable Chem. Eng.* **7**, 117-122 (2018).
29. Qiu W, *et al.* High-performance artificial nitrogen fixation at ambient conditions using a metal-free electrocatalyst. *Nat. Commun.* **9**, 1-8 (2018).
30. Wang Z, *et al.* Ambient electrochemical synthesis of ammonia from nitrogen and water catalyzed by flower-like gold microstructures. *ChemSusChem* **11**, 3480-3485 (2018).
31. Wu X, *et al.* Mn<sub>3</sub>O<sub>4</sub> nanocube: An efficient electrocatalyst toward artificial N<sub>2</sub> fixation to NH<sub>3</sub>. *Small* **14**, 1803111 (2018).
32. Yang X, *et al.* Nitrogen-doped porous carbon: Highly efficient trifunctional electrocatalyst for oxygen reversible catalysis and nitrogen reduction reaction. *J. Mater. Chem. A* **6**, 7762-7769 (2018).
33. Zhang L, *et al.* Ambient NH<sub>3</sub> synthesis via electrochemical reduction of N<sub>2</sub> over cubic sub-micron SnO<sub>2</sub> particles. *Chem. Commun.* **54**, 12966-12969 (2018).

34. Zhang R, *et al.* Enabling effective electrocatalytic N<sub>2</sub> conversion to NH<sub>3</sub> by the TiO<sub>2</sub> nanosheets array under ambient conditions. *ACS Appl. Mater. Interfaces* **10**, 28251-28255 (2018).
35. Yang X, *et al.* Mechanistic insights into electrochemical nitrogen reduction reaction on vanadium nitride nanoparticles. *J. Am. Chem. Soc.* **140**, 13387-13391 (2018).
36. Zhang X, *et al.* TiO<sub>2</sub> nanoparticles–reduced graphene oxide hybrid: an efficient and durable electrocatalyst toward artificial N<sub>2</sub> fixation to NH<sub>3</sub> under ambient conditions. *J. Mater. Chem. A* **6**, 17303-17306 (2018).
37. Zhang Y, *et al.* High-performance electrohydrogenation of N<sub>2</sub> to NH<sub>3</sub> catalyzed by multishelled hollow Cr<sub>2</sub>O<sub>3</sub> microspheres under ambient conditions. *ACS Catal.* **8**, 8540-8544 (2018).
38. Zhu X, *et al.* Efficient and durable N<sub>2</sub> reduction electrocatalysis under ambient conditions: β-FeOOH nanorods as a non-noble-metal catalyst. *Chem. Commun.* **54**, 11332-11335 (2018).
39. Cui X, Tang C, Liu XM, Wang C, Ma W, Zhang Q. Highly selective electrochemical reduction of dinitrogen to ammonia at ambient temperature and pressure over iron oxide catalysts. *Chem. Eur. J* **24**, 18494-18501 (2018).
40. Han J, *et al.* MoO<sub>3</sub> nanosheets for efficient electrocatalytic N<sub>2</sub> fixation to NH<sub>3</sub>. *J. Mater. Chem. A* **6**, 12974-12977 (2018).
41. Yu X, *et al.* Boron-doped graphene for electrocatalytic N<sub>2</sub> reduction. *Joule* **2**, 1610-1622 (2018).
42. Liu H-M, *et al.* Surfactant-free atomically ultrathin rhodium nanosheet nanoassemblies for efficient nitrogen electroreduction. *J. Mater. Chem. A* **6**, 3211-3217 (2018).
43. Liu Y, *et al.* Facile ammonia synthesis from electrocatalytic N<sub>2</sub> reduction under ambient conditions on N-doped porous carbon. *ACS Catal.* **8**, 1186-1191 (2018).
44. Lv C, *et al.* An Amorphous Noble-Metal-Free Electrocatalyst that Enables Nitrogen Fixation under Ambient Conditions. *Angew. Chem., Int. Ed.* **130**, 6181-6184 (2018).
45. Mukherjee S, *et al.* Metal-organic framework-derived nitrogen-doped highly disordered carbon for electrochemical ammonia synthesis using N<sub>2</sub> and H<sub>2</sub>O in alkaline electrolytes. *Nano Energy* **48**, 217-226 (2018).
46. Cheng H, Ding LX, Chen GF, Zhang L, Xue J, Wang H. Molybdenum carbide nanodots enable efficient electrocatalytic nitrogen fixation under ambient conditions. *Adv. Mater.* **30**, 1803694 (2018).
47. Nazemi M, Panikkanvalappil SR, El-Sayed MA. Enhancing the rate of electrochemical nitrogen reduction reaction for ammonia synthesis under ambient conditions using hollow gold nanocages. *Nano Energy* **49**, 316-323 (2018).
48. Song Y, *et al.* A physical catalyst for the electrolysis of nitrogen to ammonia. *Sci. Adv.* **4**, e1700336 (2018).
49. Zhang L, *et al.* Electrochemical ammonia synthesis via nitrogen reduction reaction on a MoS<sub>2</sub> catalyst: theoretical and experimental studies. *Adv. Mater.* **30**, 1800191 (2018).

50. Wang H, *et al.* Ambient electrosynthesis of ammonia: electrode porosity and composition engineering. *Angew. Chem., Int. Ed.* **57**, 12360-12364 (2018).
51. Lv C, *et al.* Defect engineering metal-free polymeric carbon nitride electrocatalyst for effective nitrogen fixation under ambient conditions. *Angew. Chem., Int. Ed.* **130**, 10403-10407 (2018).
52. Ren X, *et al.* Electrochemical N<sub>2</sub> fixation to NH<sub>3</sub> under ambient conditions: Mo<sub>2</sub>N nanorod as a highly efficient and selective catalyst. *Chem. Commun.* **54**, 8474-8477 (2018).
53. Li C, *et al.* Spinel LiMn<sub>2</sub>O<sub>4</sub> nanofiber: an efficient electrocatalyst for N<sub>2</sub> reduction to NH<sub>3</sub> under ambient conditions. *Inorg. Chem.* **58**, 9597-9601 (2019).
54. Chen P, *et al.* Interfacial engineering of cobalt sulfide/graphene hybrids for highly efficient ammonia electrosynthesis. *Proc. Natl. Acad. Sci. U. S. A.* **116**, 6635-6640 (2019).
55. Han Z, *et al.* Activated TiO<sub>2</sub> with tuned vacancy for efficient electrochemical nitrogen reduction. *Appl. Catal., B* **257**, 117896 (2019).
56. Chu K, Liu Y-p, Li Y-b, Zhang H, Tian Y. Efficient electrocatalytic N<sub>2</sub> reduction on CoO quantum dots. *J. Mater. Chem. A* **7**, 4389-4394 (2019).
57. Chu K, Liu Y-p, Wang J, Zhang H. NiO nanodots on graphene for efficient electrochemical N<sub>2</sub> reduction to NH<sub>3</sub>. *ACS Appl. Energy Mater.* **2**, 2288-2295 (2019).
58. Cong L, Yu Z, Liu F, Huang W. Electrochemical synthesis of ammonia from N<sub>2</sub> and H<sub>2</sub>O using a typical non-noble metal carbon-based catalyst under ambient conditions. *Catal. Sci. Technol.* **9**, 1208-1214 (2019).
59. Fan Q, *et al.* High-yield production of few-layer boron nanosheets for efficient electrocatalytic N<sub>2</sub> reduction. *Chem. Commun.* **55**, 4246-4249 (2019).
60. Fu W, Zhuang P, OliverLam Chee M, Dong P, Ye M, Shen J. Oxygen vacancies in Ta<sub>2</sub>O<sub>5</sub> nanorods for highly efficient electrocatalytic N<sub>2</sub> reduction to NH<sub>3</sub> under ambient conditions. *ACS Sustainable Chem. Eng.* **7**, 9622-9628 (2019).
61. Han L, *et al.* Atomically dispersed molybdenum catalysts for efficient ambient nitrogen fixation. *Angew. Chem., Int. Ed.* **131**, 2343-2347 (2019).
62. He C, *et al.* Identification of FeN<sub>4</sub> as an efficient active site for electrochemical N<sub>2</sub> reduction. *ACS Catal.* **9**, 7311-7317 (2019).
63. Jin H, *et al.* Nitrogen vacancies on 2D layered W<sub>2</sub>N<sub>3</sub>: A stable and efficient active site for nitrogen reduction reaction. *Adv. Mater.* **31**, 1902709 (2019).
64. Kang S, *et al.* Plasma-etching enhanced titanium oxynitride active phase with high oxygen content for ambient electrosynthesis of ammonia. *Electrochem. Commun.* **100**, 90-95 (2019).
65. Kumar RD, *et al.* Trimetallic PdCuIr with long-spined sea-urchin-like morphology for ambient electroreduction of nitrogen to ammonia. *J. Mater. Chem. A* **7**, 3190-3196 (2019).
66. Qin Q, *et al.* Enhanced Electrocatalytic N<sub>2</sub> Reduction via Partial Anion Substitution in Titanium Oxide–Carbon Composites. *Angew. Chem., Int. Ed.* **58**, 13101-13106 (2019).
67. Li L, Tang C, Xia B, Jin H, Zheng Y, Qiao S-Z. Two-dimensional mosaic bismuth nanosheets for highly selective ambient electrocatalytic nitrogen reduction. *ACS Catal.* **9**, 2902-2908 (2019).

68. Li X, *et al.* A MoS<sub>2</sub> nanosheet–reduced graphene oxide hybrid: an efficient electrocatalyst for electrocatalytic N<sub>2</sub> reduction to NH<sub>3</sub> under ambient conditions. *J. Mater. Chem. A* **7**, 2524-2528 (2019).
69. Li Y, *et al.* In Situ Growth of Nitrogen-Doped Carbon-Coated  $\gamma$ -Fe<sub>2</sub>O<sub>3</sub> Nanoparticles on Carbon Fabric for Electrochemical N<sub>2</sub> Fixation. *ACS Sustainable Chem. Eng.* **7**, 8853-8859 (2019).
70. Liu S, Wang M, Qian T, Ji H, Liu J, Yan C. Facilitating nitrogen accessibility to boron-rich covalent organic frameworks via electrochemical excitation for efficient nitrogen fixation. *Nat. Commun.* **10**, 1-9 (2019).
71. Liu Y, *et al.* Dramatically Enhanced Ambient Ammonia Electrosynthesis Performance by In-Operando Created Li–S Interactions on MoS<sub>2</sub> Electrocatalyst. *Adv. Energy Mater.* **9**, 1803935 (2019).
72. Luo Y, Chen G-F, Ding L, Chen X, Ding L-X, Wang H. Efficient electrocatalytic N<sub>2</sub> fixation with MXene under ambient conditions. *Joule* **3**, 279-289 (2019).
73. Manjunatha R, Karajić A, Goldstein V, Schechter A. Electrochemical ammonia generation directly from nitrogen and air using an iron-oxide/titania-based catalyst at ambient conditions. *ACS Appl. Mater. Interfaces* **11**, 7981-7989 (2019).
74. Pang F, *et al.* Bimodal nanoporous Pd<sub>3</sub>Cu<sub>1</sub> alloy with restrained hydrogen evolution for stable and high yield electrochemical nitrogen reduction. *Nano Energy* **58**, 834-841 (2019).
75. Ren X, *et al.* High-performance N<sub>2</sub>-to-NH<sub>3</sub> conversion electrocatalyzed by Mo<sub>2</sub>C nanorod. *ACS Cent. Sci.* **5**, 116-121 (2018).
76. Song P, Wang H, Kang L, Ran B, Song H, Wang R. Electrochemical nitrogen reduction to ammonia at ambient conditions on nitrogen and phosphorus co-doped porous carbon. *Chem. Commun.* **55**, 687-690 (2019).
77. Tao H, *et al.* Nitrogen fixation by Ru single-atom electrocatalytic reduction. *Chem* **5**, 204-214 (2019).
78. Wang F, Liu Yp, Zhang H, Chu K. CuO/graphene nanocomposite for nitrogen reduction reaction. *ChemCatChem* **11**, 1441-1447 (2019).
79. Wang H, *et al.* Direct fabrication of bi-metallic PdRu nanorod assemblies for electrochemical ammonia synthesis. *Nanoscale* **11**, 5499-5505 (2019).
80. Wang H, *et al.* Electrochemical fabrication of porous Au film on Ni foam for nitrogen reduction to ammonia. *Small* **15**, 1804769 (2019).
81. Wang M, *et al.* Over 56.55% Faradaic efficiency of ambient ammonia synthesis enabled by positively shifting the reaction potential. *Nat. Commun.* **10**, 1-8 (2019).
82. Wang Y, *et al.* Generating Defect-Rich Bismuth for Enhancing the Rate of Nitrogen Electroreduction to Ammonia. *Angew. Chem., Int. Ed.* **58**, 9464-9469 (2019).
83. Wang Z, *et al.* Electrocatalytic hydrogenation of N<sub>2</sub> to NH<sub>3</sub> by MnO: Experimental and theoretical investigations. *Adv. Sci.* **6**, 1801182 (2019).
84. Wu D, *et al.* Ambient electrochemical N<sub>2</sub> reduction to NH<sub>3</sub> under alkaline conditions enabled by a layered K<sub>2</sub>Ti<sub>4</sub>O<sub>9</sub> nanobelt. *Chem. Commun.* **55**, 7546-7549 (2019).

85. Xia L, *et al.* Cr<sub>2</sub>O<sub>3</sub> nanoparticle-reduced graphene oxide hybrid: A highly active electrocatalyst for N<sub>2</sub> reduction at ambient conditions. *Inorg. Chem.* **58**, 2257-2260 (2019).
86. Xu B, *et al.* La<sub>2</sub>O<sub>3</sub> nanoplate: An efficient electrocatalyst for artificial N<sub>2</sub> fixation to NH<sub>3</sub> with excellent selectivity at ambient condition. *Electrochim. Acta* **298**, 106-111 (2019).
87. Yin F, Lin X, He X, Chen B, Li G, Yin H. High Faraday efficiency for electrochemical nitrogen reduction reaction on Co@ N-doped carbon derived from a metal-organic framework under ambient conditions. *Mater. Lett.* **248**, 109-113 (2019).
88. Yu H, *et al.* Bimetallic Ag<sub>3</sub>Cu porous networks for ambient electrolysis of nitrogen to ammonia. *J. Mater. Chem. A* **7**, 12526-12531 (2019).
89. Zhang G, *et al.* Triggering surface oxygen vacancies on atomic layered molybdenum dioxide for a low energy consumption path toward nitrogen fixation. *Nano Energy* **59**, 10-16 (2019).
90. Zhang L, Ding LX, Chen GF, Yang X, Wang H. Ammonia synthesis under ambient conditions: Selective electroreduction of dinitrogen to ammonia on black phosphorus nanosheets. *Angew. Chem., Int. Ed.* **131**, 2638-2642 (2019).
91. Zhang X, *et al.* Boron nanosheet: an elemental two-dimensional (2D) material for ambient electrocatalytic N<sub>2</sub>-to-NH<sub>3</sub> fixation in neutral media. *ACS Catal.* **9**, 4609-4615 (2019).
92. Zhang Y, *et al.* Hexagonal boron nitride nanosheet for effective ambient N<sub>2</sub> fixation to NH<sub>3</sub>. *Nano Res.* **12**, 919-924 (2019).
93. Zhao C, *et al.* Ambient electrosynthesis of ammonia on a biomass-derived nitrogen-doped porous carbon electrocatalyst: Contribution of pyridinic nitrogen. *ACS Energy Lett.* **4**, 377-383 (2019).
94. Zhao J, *et al.* Defect-rich fluorographene nanosheets for artificial N<sub>2</sub> fixation under ambient conditions. *Chem. Commun.* **55**, 4266-4269 (2019).
95. Zheng J, *et al.* Tuning the Electron Localization of Gold Enables the Control of Nitrogen-to-Ammonia Fixation. *Angew. Chem., Int. Ed.* **58**, 18604-18609 (2019).
96. Xue Z-H, *et al.* Electrochemical reduction of N<sub>2</sub> into NH<sub>3</sub> by donor-acceptor couples of Ni and Au nanoparticles with a 67.8% Faradaic efficiency. *J. Am. Chem. Soc.* **141**, 14976-14980 (2019).
97. Hao Y-C, *et al.* Promoting nitrogen electroreduction to ammonia with bismuth nanocrystals and potassium cations in water. *Nat. Catal.* **2**, 448-456 (2019).
98. Liu YT, Chen X, Yu J, Ding B. Carbon-Nanoplated CoS@ TiO<sub>2</sub> Nanofibrous Membrane: An Interface-Engineered Heterojunction for High-Efficiency Electrocatalytic Nitrogen Reduction. *Angew. Chem., Int. Ed.* **58**, 18903-18907 (2019).
99. Wang Xh, Wang J, Li Yb, Chu K. Nitrogen-Doped NiO Nanosheet Array for Boosted Electrocatalytic N<sub>2</sub> Reduction. *ChemCatChem* **11**, 4529-4536 (2019).
100. Cheng H, Cui P, Wang F, Ding LX, Wang H. High efficiency electrochemical nitrogen fixation achieved with a lower pressure reaction system by changing the chemical equilibrium. *Angew. Chem., Int. Ed.* **58**, 15541-15547 (2019).
101. Chen X, Liu Y-T, Ma C, Yu J, Ding B. Self-organized growth of flower-like SnS<sub>2</sub> and forest-like ZnS nanoarrays on nickel foam for synergistic superiority in electrochemical ammonia synthesis. *J. Mater. Chem. A* **7**, 22235-22241 (2019).

102. Zhao X, *et al.* In situ nano Au triggered by a metal boron organic polymer: efficient electrochemical N<sub>2</sub> fixation to NH<sub>3</sub> under ambient conditions. *J. Mater. Chem. A* **7**, 20945-20951 (2019).
103. Zang W, *et al.* Copper single atoms anchored in porous nitrogen-doped carbon as efficient pH-Universal catalysts for the nitrogen reduction reaction. *ACS Catal.* **9**, 10166-10173 (2019).
104. Guo J, *et al.* Tunable synthesis of multiply twinned intermetallic Pd<sub>3</sub>Pb nanowire networks toward efficient N<sub>2</sub> to NH<sub>3</sub> conversion. *J. Mater. Chem. A* **7**, 20247-20253 (2019).
105. Zou H, Rong W, Long B, Ji Y, Duan L. Corrosion-Induced Cl-Doped Ultrathin Graphdiyne toward Electrocatalytic Nitrogen Reduction at Ambient Conditions. *ACS Catal.* **9**, 10649-10655 (2019).
106. Li C, Fu Y, Wu Z, Xia J, Wang X. Sandwich-like reduced graphene oxide/yolk-shell-structured Fe@Fe<sub>3</sub>O<sub>4</sub>/carbonized paper as an efficient freestanding electrode for electrochemical synthesis of ammonia directly from H<sub>2</sub>O and nitrogen. *Nanoscale* **11**, 12997-13006 (2019).
107. Ahmed MI, Chen S, Ren W, Chen X, Zhao C. Synergistic bimetallic CoFe<sub>2</sub>O<sub>4</sub> clusters supported on graphene for ambient electrocatalytic reduction of nitrogen to ammonia. *Chem. Commun.* **55**, 12184-12187 (2019).
108. Lin Y-X, *et al.* Boosting selective nitrogen reduction to ammonia on electron-deficient copper nanoparticles. *Nat. Commun.* **10**, 1-7 (2019).
109. Zhao J, *et al.* Efficient electrohydrogenation of N<sub>2</sub> to NH<sub>3</sub> by oxidized carbon nanotubes under ambient conditions. *Chem. Commun.* **55**, 4997-5000 (2019).
110. Tong W, Huang B, Wang P, Li L, Shao Q, Huang X. Crystal-Phase-Engineered PdCu Electrocatalyst for Enhanced Ammonia Synthesis. *Angew. Chem., Int. Ed.* **59**, 2649-2653 (2020).
111. Huang H, Li F, Xue Q, Zhang Y, Yin S, Chen Y. Salt-Templated Construction of Ultrathin Cobalt Doped Iron Thiophosphate Nanosheets toward Electrochemical Ammonia Synthesis. *Small* **15**, 1903500 (2019).
112. Tan L, *et al.* Synthesis of ammonia via electrochemical nitrogen reduction on high-index faceted Au nanoparticles with a high faradaic efficiency. *Chem. Commun.* **55**, 14482-14485 (2019).
113. Chen Y, Wu B, Sun B, Wang N, Hu W, Komarneni S. N-doped porous carbon self-generated on nickel oxide nanosheets for electrocatalytic N<sub>2</sub> fixation with a Faradaic efficiency beyond 30%. *ACS Sustainable Chem. Eng.* **7**, 18874-18883 (2019).
114. Peng M, *et al.* Bioinspired Fe<sub>3</sub>C@C as Highly Efficient Electrocatalyst for Nitrogen Reduction Reaction under Ambient Conditions. *ACS Appl. Mater. Interfaces* **11**, 40062-40068 (2019).
115. Wu T, *et al.* Greatly improving electrochemical N<sub>2</sub> reduction over TiO<sub>2</sub> nanoparticles by iron doping. *Angew. Chem., Int. Ed.* **58**, 18449-18453 (2019).
116. Liu YT, Li D, Yu J, Ding B. Stable Confinement of Black Phosphorus Quantum Dots on Black Tin Oxide Nanotubes: A Robust, Double-Active Electrocatalyst toward Efficient Nitrogen Fixation. *Angew. Chem., Int. Ed.* **131**, 16591-16596 (2019).

117. Suryanto BH, *et al.* MoS<sub>2</sub> polymorphic engineering enhances selectivity in the electrochemical reduction of nitrogen to ammonia. *ACS Energy Lett.* **4**, 430-435 (2018).
118. Wang Y, *et al.* Self-supported NbSe<sub>2</sub> nanosheet arrays for highly efficient ammonia electrosynthesis under ambient conditions. *J. Catal.* **381**, 78-83 (2020).
119. Zhang J, Ji Y, Wang P, Shao Q, Li Y, Huang X. Adsorbing and Activating N<sub>2</sub> on Heterogeneous Au–Fe<sub>3</sub>O<sub>4</sub> Nanoparticles for N<sub>2</sub> Fixation. *Adv. Funct. Mater.* **30**, 1906579 (2020).
120. Wang J, *et al.* A General Strategy to Glassy M-Te (M= Ru, Rh, Ir) Porous Nanorods for Efficient Electrochemical N<sub>2</sub> Fixation. *Adv. Mater.* **32**, 1907112 (2020).
121. Ren J-T, Wan C-Y, Pei T-Y, Lv X-W, Yuan Z-Y. Promotion of electrocatalytic nitrogen reduction reaction on N-doped porous carbon with secondary heteroatoms. *Appl. Catal., B* **266**, 118633 (2020).
122. Wang H-B, *et al.* Bionic Design of a Mo (IV)-Doped FeS<sub>2</sub> Catalyst for Electroreduction of Dinitrogen to Ammonia. *ACS Catal.* **10**, 4914-4921 (2020).
123. Tong Y, *et al.* Vacancy Engineering of Iron-Doped W<sub>18</sub>O<sub>49</sub> Nanoreactors for Low-Barrier Electrochemical Nitrogen Reduction. *Angew. Chem., Int. Ed.* **59**, 7356-7361 (2020).
124. Peng G, Wu J, Wang M, Niklas J, Zhou H, Liu C. Nitrogen-Defective Polymeric Carbon Nitride Nanolayer Enabled Efficient Electrocatalytic Nitrogen Reduction with High Faradaic Efficiency. *Nano Letters* **20**, 2879-2885 (2020).
125. Zhang L, *et al.* A Janus Fe-SnO<sub>2</sub> Catalyst that Enables Bifunctional Electrochemical Nitrogen Fixation. *Angew. Chem., Int. Ed.* **132**, 10980-10985 (2020).
126. Becker JY, Avraham S, Posin B. Nitrogen fixation: Part I. Electrochemical reduction of titanium compounds in the presence of catechol and N<sub>2</sub> in MeOH or THF. *J. Electroanal. Chem. Interfacial Electrochem.* **230**, 143-153 (1987).
127. Becker JY, Posin B. Nitrogen fixation: Part II. Nitrogen reduction by electrochemically generated vanadium (II) promoted by various organic ligands in basic methanol. *J. Electroanal. Chem. Interfacial Electrochem.* **250**, 385-397 (1988).
128. Tsuneto A, Kudo A, Sakata T. Efficient electrochemical reduction of N<sub>2</sub> to NH<sub>3</sub> catalyzed by lithium. *Chem. Lett.* **22**, 851-854 (1993).
129. Tsuneto A, Kudo A, Sakata T. Lithium-mediated electrochemical reduction of high pressure N<sub>2</sub> to NH<sub>3</sub>. *J. Electroanal. Chem.* **367**, 183-188 (1994).
130. Kim K, Lee N, Yoo C-Y, Kim J-N, Yoon HC, Han J-I. Communication—electrochemical reduction of nitrogen to ammonia in 2-propanol under ambient temperature and pressure. *J. Electrochem. Soc.* **163**, F610 (2016).
131. Kim K, Yoo C-Y, Kim J-N, Yoon HC, Han J-I. Electrochemical synthesis of ammonia from water and nitrogen in ethylenediamine under ambient temperature and pressure. *J. Electrochem. Soc.* **163**, F1523 (2016).
132. Katayama A, Inomata T, Ozawa T, Masuda H. Electrochemical conversion of dinitrogen to ammonia induced by a metal complex–supported ionic liquid. *Electrochem. Commun.* **67**, 6-10 (2016).



133. Zhou F, *et al.* Electro-synthesis of ammonia from nitrogen at ambient temperature and pressure in ionic liquids. *Energy Environ. Sci.* **10**, 2516-2520 (2017).
134. Lee HK, *et al.* Favoring the unfavored: selective electrochemical nitrogen fixation using a reticular chemistry approach. *Sci. Adv.* **4**, eaar3208 (2018).
135. Suryanto BH, *et al.* Rational electrode–electrolyte design for efficient ammonia electrosynthesis under ambient conditions. *ACS Energy Lett.* **3**, 1219-1224 (2018).
136. Lazouski N, Schiffer ZJ, Williams K, Manthiram K. Understanding continuous lithium-mediated electrochemical nitrogen reduction. *Joule* **3**, 1127-1139 (2019).
137. Andersen SZ, *et al.* A rigorous electrochemical ammonia synthesis protocol with quantitative isotope measurements. *Nature* **570**, 504-508 (2019).
138. Schwalbe JA, *et al.* A Combined Theory-Experiment Analysis of the Surface Species in Lithium-Mediated NH<sub>3</sub> Electrosynthesis. *ChemElectroChem* **7**, 1542-1549 (2020).
139. Lazouski N, Chung M, Williams K, Gala ML, Manthiram K. Non-aqueous gas diffusion electrodes for rapid ammonia synthesis from nitrogen and water-splitting-derived hydrogen. *Nat. Catal.* **3**, 463-469 (2020).
140. Koh CSL, Lee HK, Fan Sim HY, Han X, Phan-Quang GC, Ling XY. Turning Water from a Hindrance to the Promotor of Preferential Electrochemical Nitrogen Reduction. *Chem. Mater.* **32**, 1674-1683 (2020).
141. Sim HYF, *et al.* ZIF-induced d-band Modification in Bimetallic Nanocatalyst: Achieving > 44% Efficiency in Ambient Nitrogen Reduction Reaction. *Angew. Chem., Int. Ed.* **132**, 17145-17151 (2020).
